# Supplementary material for: Fabrication of multi-stimuli responsive supramolecular hydrogels based on host–guest inclusion complexation of a tadpole-shaped cyclodextrin derivative with the azobenzene dimer
Source: Royal Society of Chemistry journal article supplement (doi:10.1039/c7py00698e), 2017-01-01
Supplement: c7py00698e1.pdf [file c7py00698e1.pdf]

**Fabrication of multi-stimuli responsive supramolecular hydrogels based on host–guest inclusion complexation of tadpole-shaped cyclodextrin derivative with azobenzene dimer**

Xing Wang,<sup>‡a</sup> Juan Wang,<sup>‡a</sup> Yanyu Yang,<sup>a,b</sup> Fei Yang,<sup>a,b</sup> and Decheng Wu<sup>\*a,b</sup>

<sup>a</sup> Beijing National Laboratory for Molecular Sciences, State Key Laboratory of Polymer Physics & Chemistry, Institute of Chemistry, Chinese Academy of Sciences, Beijing 100190, China

<sup>b</sup> University of Chinese Academy of Sciences, Beijing 100049, P.R. China

E-mail: dcwu@iccas.ac.cn



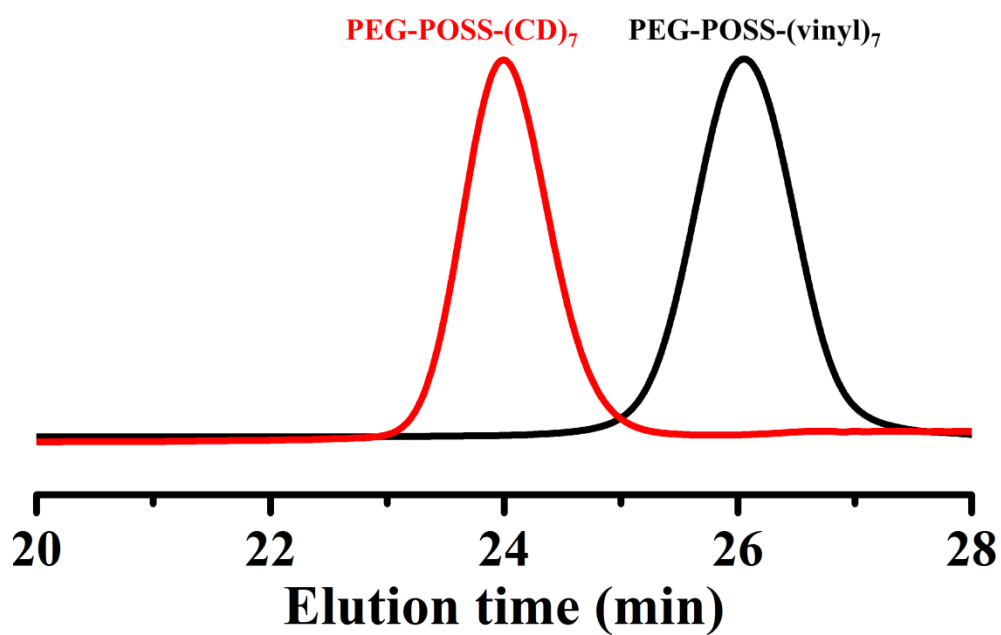

**Fig. S3** GPC curves of the PEG-POSS-(vinyl)<sub>7</sub> and PEG-POSS-(CD)<sub>7</sub> polymers.

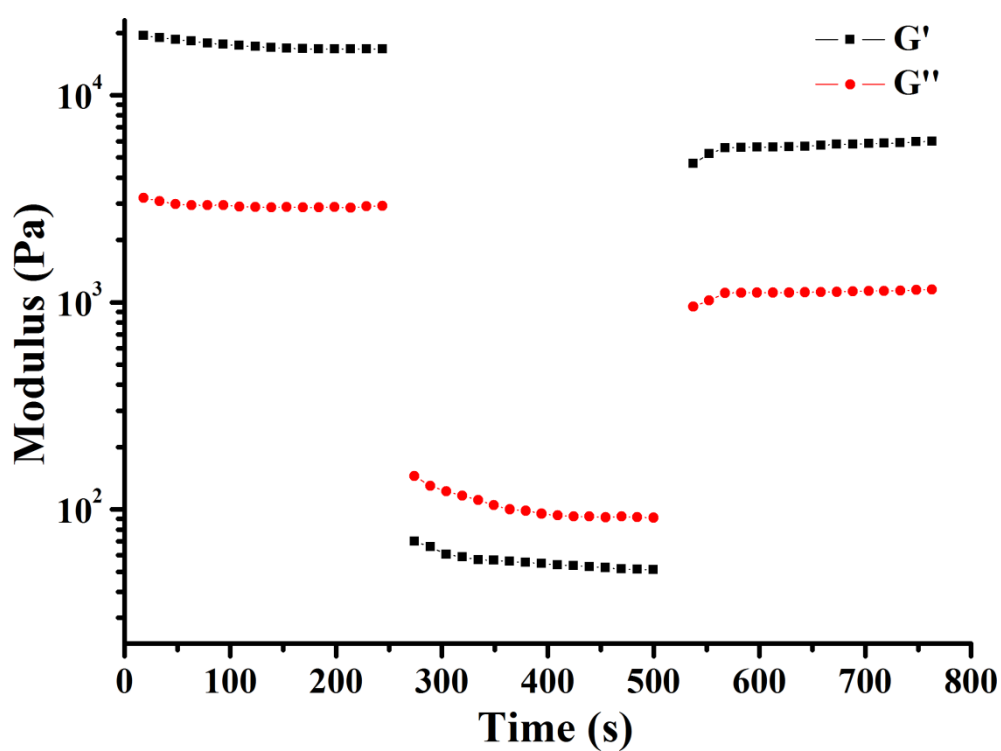

**Fig. S4** The step strain experimental data obtained from the Gel-2.
